# Supplementary material for: Synergistic effects of phosphorus/nitrogen co-doping and morphology regulation enhance the catalytic hydrogenation performance of Ru-based catalysts for benzoic acid
Source: Royal Society of Chemistry journal article supplement (doi:10.1039/d3nj02205f), 2023-01-01
Supplement: d3nj02205f1.pdf [file d3nj02205f1.pdf]

## Supporting Information

# Synergistic effects of phosphorus/nitrogen co-doping and morphology regulation enhance the catalytic hydrogenation performance of Ru-based catalysts for benzoic acid

Zijian Wang,<sup>1</sup> Yuyao Wang,<sup>1</sup> Zhengyu Pan,<sup>1</sup> Guoquan Zhou,<sup>2</sup> Lele Yan,<sup>1</sup> Lina Zhu,<sup>1</sup> Zheng Fang,<sup>1</sup> Tongyang Song,<sup>1</sup> Xianlang Chen <sup>\*1</sup> and Rongrong Li <sup>\*1</sup>

<sup>1</sup>Engineering Research Center of Recycling & Comprehensive Utilization of Pharmaceutical and Chemical Waste of Zhejiang Province, Taizhou University, Taizhou 318000, Zhejiang, China.

<sup>2</sup>School of Materials and Chemical Engineering, Ningbo University of Technology, Ningbo City, Zhejiang Province 315211, P. R. China.

\*Corresponding author: Email: [chenxianlangaini@163.com](mailto:chenxianlangaini@163.com) (X. Chen); [lrr@tzc.edu.cn](mailto:lrr@tzc.edu.cn) (R. Li)

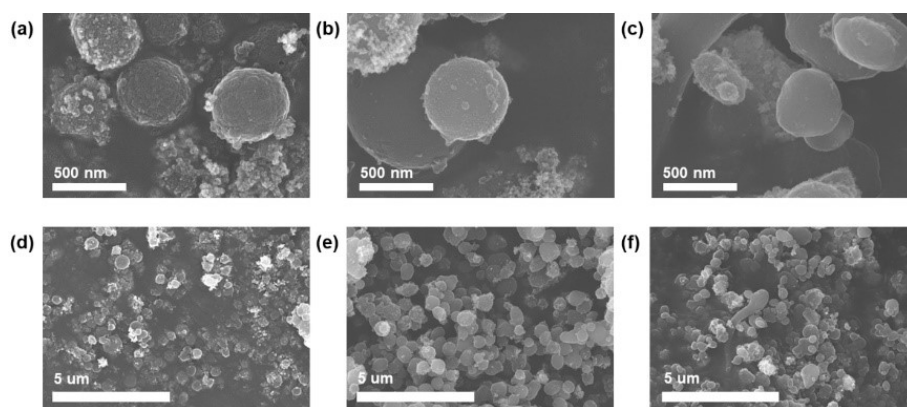

**Fig. S1** SEM images of (a, d) Ru/PPNC-1, (b, e) Ru/PPNC-2, (c, f) Ru/PPNC-3.

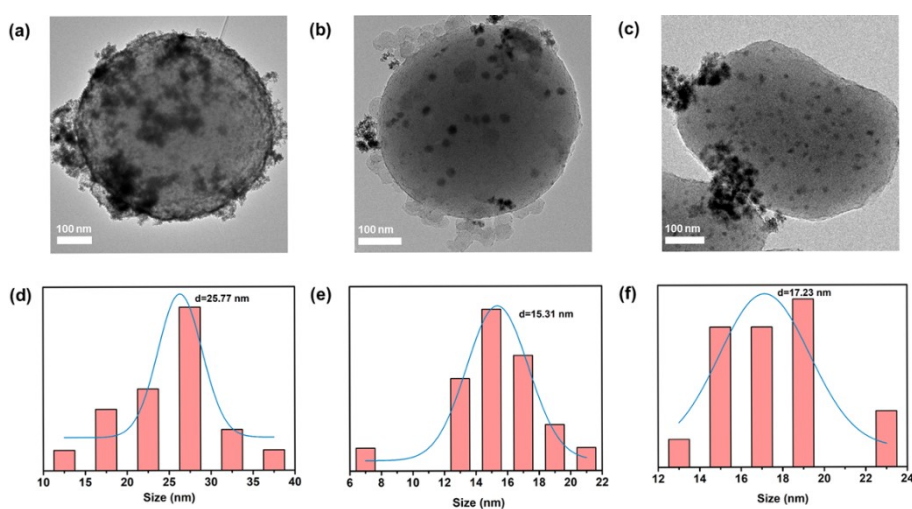

**Fig. S2** TEM images of (a) Ru/PPNC-1, (b) Ru/PPNC-2, (c) Ru/PPNC-3 and the corresponding particle size distribution of (d) Ru/PPNC-1, (e) Ru/PPNC-2 and (f) Ru/PPNC-3, respectively.

**Table S1** Results of metal dispersion of catalysts.

| Sample    | Metal Dispersion |
|-----------|------------------|
| Ru/PPNC-1 | 20.58%           |
| Ru/PPNC-2 | 25.21%           |
| Ru/PPNC-3 | 22.51%           |

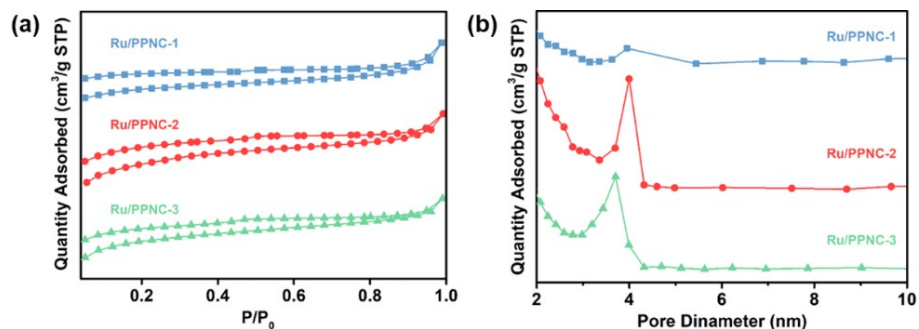

**Fig. S3** (a) N<sub>2</sub> adsorption-desorption isotherms analysis showing catalysts possess a mesoporous structure. (b) BJH pore size distribution verifies the mesoporous characteristics of the samples.

**Table S2** Specific surface area and pore structure results of a series of catalysts.

| Sample    | $S_{\text{BET}}/ (\text{m}^2/\text{g})$ | $V_{\text{pore}}(\text{cm}^3/\text{g})$ | $R_{\text{average}}/ (\text{nm})$ |
|-----------|-----------------------------------------|-----------------------------------------|-----------------------------------|
| Ru/PPNC-1 | 171.6                                   | 0.1096                                  | 2.5547                            |
| Ru/PPNC-2 | 416.4                                   | 0.2270                                  | 2.1810                            |
| Ru/PPNC-3 | 354.9                                   | 0.1933                                  | 2.1781                            |

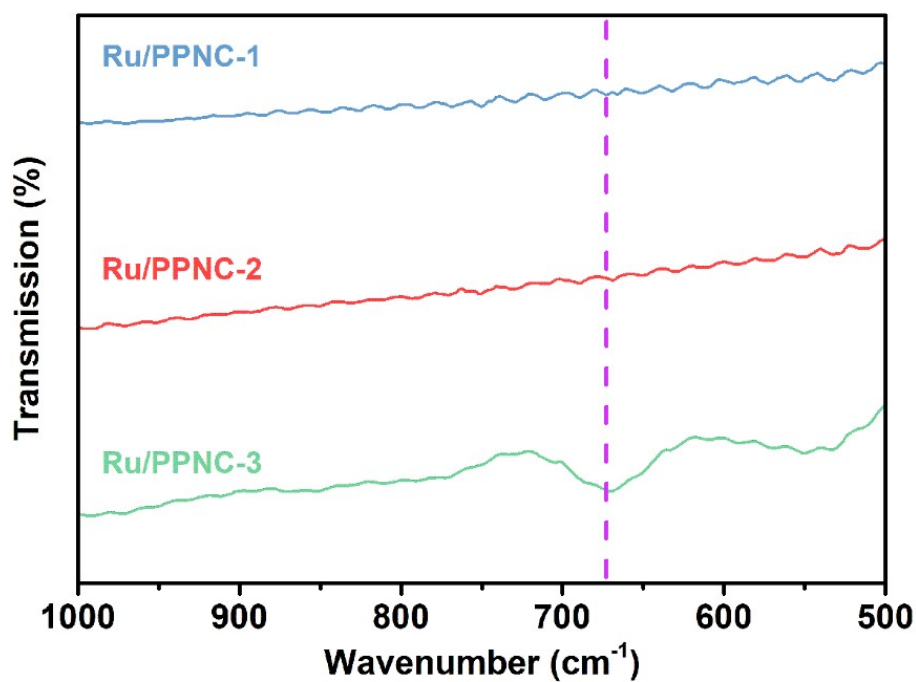

**Fig. S4** Local magnification of FTIR pattern.

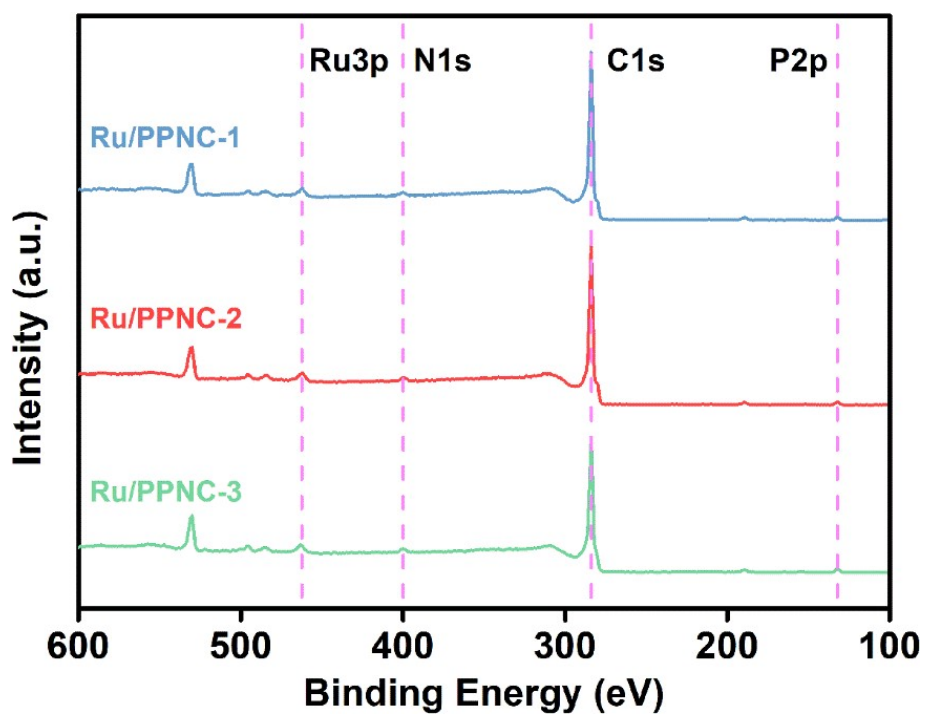

Fig. S5 XPS high-resolution spectra the surface compositions of catalysts.

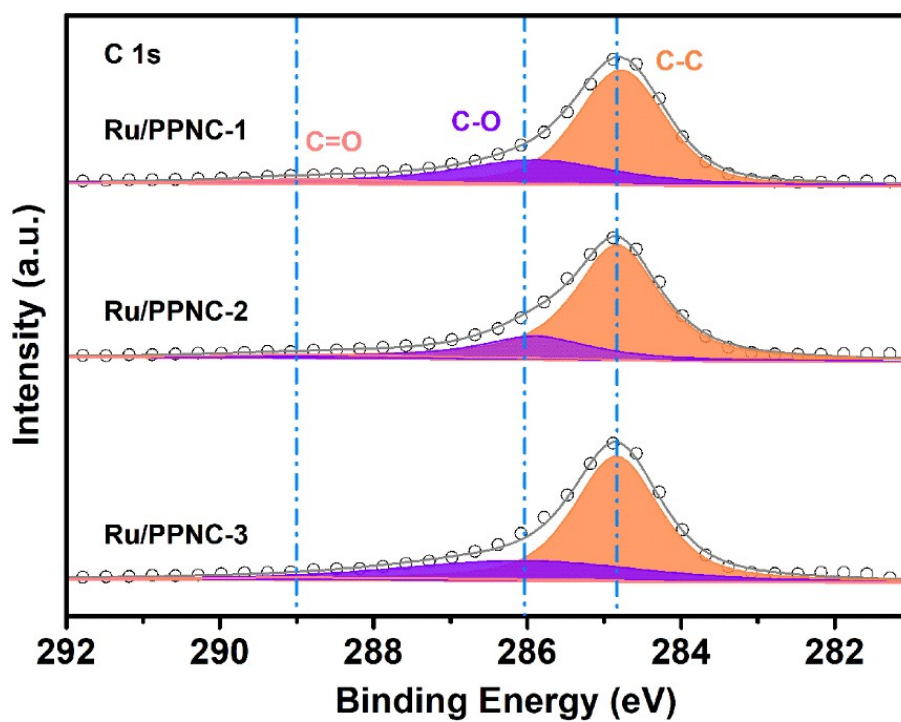

Fig. S6 XPS spectra of C 1s of Ru/PPNC-1, Ru/PPNC-2 and Ru/PPNC-3.

**Table S3** Element analysis results of the samples with different content of ICP.

| Sample    | Ru (wt%) |
|-----------|----------|
| Ru/PPNC-1 | 2.05%    |
| Ru/PPNC-2 | 1.71%    |
| Ru/PPNC-3 | 2.00%    |

**Table S4** Analysis results of N and P doping amounts of different samples in XPS.

| Sample    | N (wt%) | P (wt%) | N:P  |
|-----------|---------|---------|------|
| Ru/PPNC-1 | 2.42    | 1.69    | 1.43 |
| Ru/PPNC-2 | 2.32    | 1.71    | 1.36 |
| Ru/PPNC-3 | 2.66    | 2.04    | 1.30 |

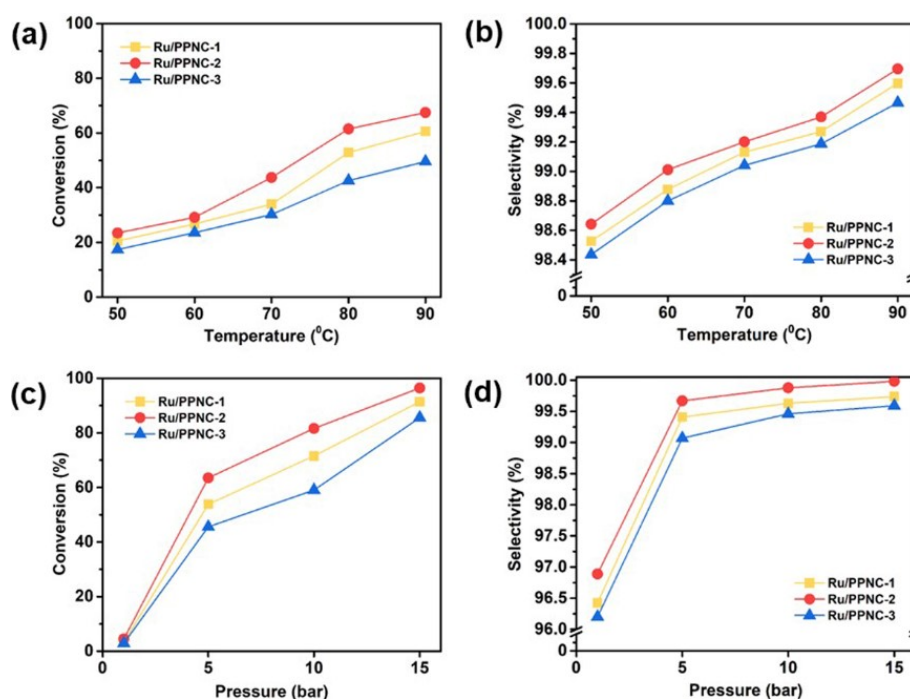**Fig. S7** Performance of the prepared series of catalysts at different temperatures and H<sub>2</sub> pressure (a) BA conversion, (b) CCA selectivity. Reaction conditions: catalyst, 10 mg; BA 12.2 mg, solvent, water (1 mL); hydrogen pressure, 0.5 MPa; time, 60min. (c) BA conversion, (d) CCA selectivity. Reaction conditions: catalyst, 10 mg; BA 12.2 mg, solvent, water (1 mL); temperature, 80 °C; time, 60 min.

**Table S5** Hydrogenation of BA over Ru/PPNC-2 catalyst in different solvents.

| Entry | Solvents         | t (min) | T (°C) | Conversion (%) | Selectivity (%) |
|-------|------------------|---------|--------|----------------|-----------------|
| 1     | H <sub>2</sub> O | 60      | 80     | 81.64          | 99.89           |
| 2     | Dioxane          | 60      | 80     | 4.59           | 28.39           |
| 3     | Cyclohexane      | 60      | 80     | 19.80          | 84.76           |
| 4     | Ethanol          | 60      | 80     | 42.67          | 91.92           |
| 5     | THF              | 60      | 80     | 40.60          | 81.20           |
| 6     | Toluene          | 60      | 80     | 6.67           | 64.85           |
| 7     | Acetonitrile     | 60      | 80     | 2.01           | 42.49           |
| 8     | Hexyl hydride    | 60      | 80     | 44.26          | 95.86           |

Reaction conditions: 0.1 mmol BA, 10 mg Ru/PPNCC-2, 1 mL solvent, 1 MPa H<sub>2</sub>.

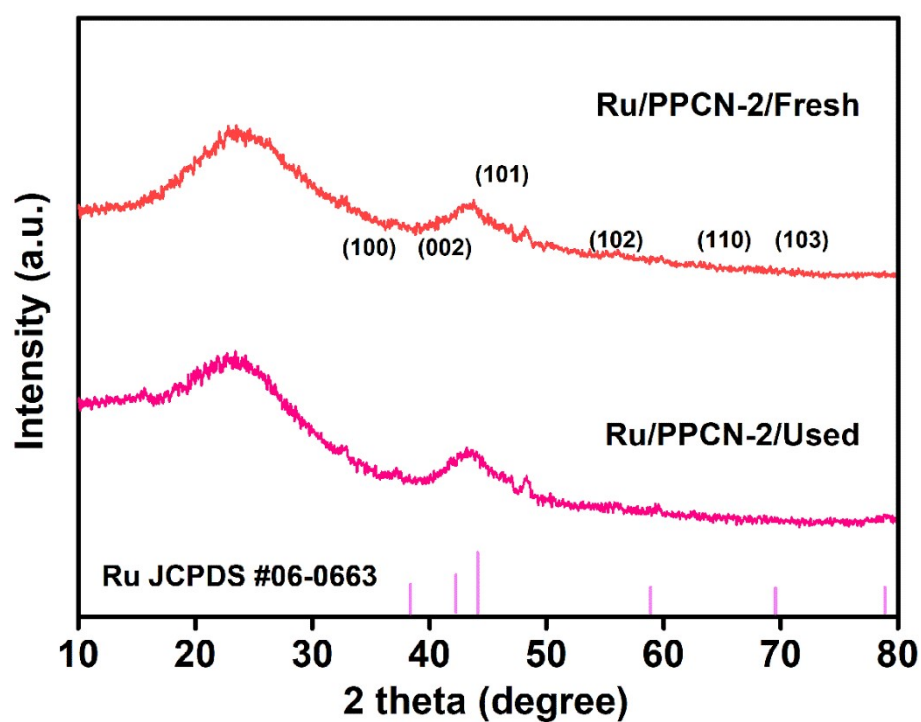

**Fig. S8** XRD spectra of new catalysts and catalysts reused.

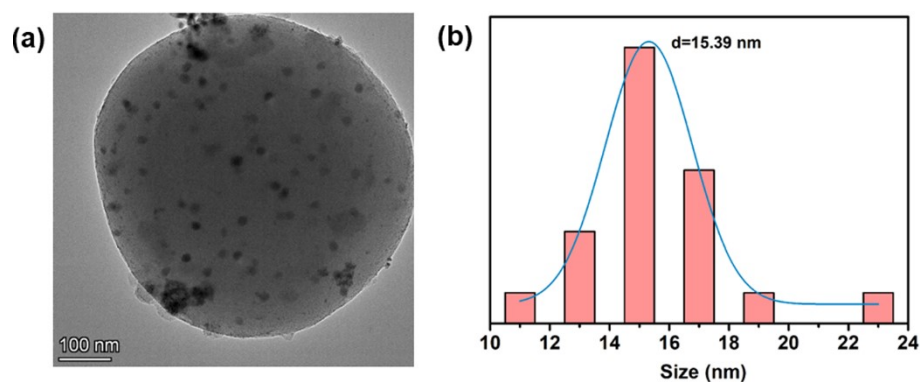

**Fig. S9** TEM images of Ru/PPNC-2 reused.
